# 1 **Precise measurement of nanoscopic septin ring structures in deep learning-** 2 **assisted quantitative superresolution microscopy**

3

4 Amin Zehtabian\*#, Paul Markus Müller\*#, Maximilian Goisser, Leon Obendorf, Lea Jänisch,  
5 Nadja Hümpfer, Jakob Rentsch and Helge Ewers

6

7 Institut für Chemie und Biochemie, Freie Universität Berlin, Thielallee 63, 14195, Berlin, Germany

8 **\* Corresponding authors**

9 A. Zehtabian: amin.zehtabian@fu-berlin.de

10 P.M. Müller: paulmarkus.mueller@fu-berlin.de

11 **# equal contribution**

12

## 13 **Abstract**

14 The combination of image analysis and fluorescence superresolution microscopy methods  
15 allows for unprecedented insight into the organization of macromolecular assemblies in cells.  
16 Advances in deep learning-based object recognition enables the automated processing of  
17 large amounts of data, resulting in high accuracy through averaging. However, while the  
18 analysis of highly symmetric structures of constant size allows for a resolution approaching  
19 the dimensions of structural biology, deep learning methods are prone to different forms of  
20 bias. A biased recognition of structures may prohibit the development of readouts for  
21 processes that involve significant changes in size or shape of amorphous macromolecular  
22 complexes. What is required to overcome this problem is a detailed investigation of potential  
23 sources of bias and the rigorous testing of trained models using real or simulated data  
24 covering a wide dynamic range of possible results. Here we combine single molecule  
25 localization-based superresolution microscopy of septin ring structures with the training of  
26 several different deep learning models for a quantitative investigation of bias resulting from  
27 different training approaches and finally quantitative changes in septin ring structures. We  
28 find that trade-off exists between measurement accuracy and the dynamic range of  
29 recognized phenotypes. Using our trained models, we furthermore find that septin ring size  
30 can be explained by the number of subunits they are assembled from alone. Our work  
31 provides a new experimental system for the investigation of septin polymerization.

## 1 Introduction

2

3 Light microscopy is a technique of fundamental importance in cell biology and with the  
4 development of superresolution techniques has allowed unprecedented insight into cellular  
5 processes on the brink of structural biology<sup>1-7</sup>. Machine learning-based computational image  
6 processing furthermore allows for high-throughput analysis of even complex phenotypes in  
7 cells<sup>8-12</sup> and has accelerated progress in cell biological discovery. In recent years a number of  
8 open source deep learning platforms have been made available<sup>13-22</sup> that require minimal  
9 know-how on the user side. At the same time, methods have been developed to reduce  
10 background<sup>23,24</sup> and to accelerate image processing in superresolution microscopy<sup>25-27</sup>.  
11 Especially in superresolution microscopy, image processing allows for ultrahigh resolution of  
12 multiprotein complexes such as nuclear pores<sup>3,28</sup> or centrioles<sup>29,30</sup>. However, these are highly  
13 symmetric structures of constant size that bear several symmetry axes. As a result, they  
14 contain intrinsic means to allow for accurate averaging. For superresolution microscopy and  
15 averaging to harness its full power with the help of deep learning-based image processing to  
16 improve resolution of more amorphous structures and to develop quantitative readouts for  
17 structural changes it remains to be determined to what extent deep learning methods can  
18 handle changes in organization or even size of target structures. Overfitting may make it  
19 impossible to detect even small changes in morphology or size, on the other hand poor fitting  
20 may not allow for accurate measurements.

21 Here we combine deep learning-assisted image analysis based on an open-source platform  
22 with single molecule localization-based superresolution microscopy (SMLM) of subresolution  
23 septin ring structures. Septins are the fourth cytoskeleton<sup>31,32</sup> and assemble from nonpolar  
24 heteromultimeric rod-shaped complexes into ring-like structures of subresolution size when  
25 not associated to tubulin or actin<sup>33</sup>. These rings are free of actin and are thought to represent  
26 *bona fide* septin filamentous polymers<sup>34</sup>. The composition of septin complexes plays an  
27 important role in septin function<sup>35,36</sup> and septin ring size depends on the composition of  
28 septin complexes<sup>37</sup>. Septin ring size may thus be a long sought-after readout for complex  
29 assembly and composition. Here we ask what factors in supervised deep learning affect ring  
30 recognition and finally, accuracy of ring size measurements in native and perturbed cells with  
31 differing ring size. To do so, we train six different models on data annotated according to

1 several different parameters and by three different experts and validate them on cellular and  
2 synthetic SMLM datasets. We find that while most models readily recognize ring-structures  
3 in the size range expected in native cells and allow for highly accurate determination of septin  
4 ring diameter from SMLM data, only few models allow for the accurate recognition and  
5 measurement of rings of differing size. We furthermore show that septin ring size can be  
6 explained by septin complex composition alone, and we thus provide a new experimental  
7 paradigm for the investigation of septin complex assembly. Our results demonstrate that the  
8 combination of deep learning with SMLM can provide accurate readouts of changes in the  
9 size of amorphous multiprotein structures and that experimental design and careful  
10 validation are essential for the generation of reliable experimental pipelines.

11

12

## 1 Results

2 We chose septin rings as a model to test the robustness and accuracy of deep learning-  
3 assisted superresolution microscopy for measurements of subresolution cellular structures.  
4 The septins are a family of GTP-binding proteins that comprise the fourth cytoskeleton.  
5 Septins can assemble into filaments themselves or attach to actin stress fibers, however,  
6 when actin stress fibers are collapsed via the use of cytochalasin D, they form ring structures  
7 of around 350 nm diameter<sup>33,37</sup> (Figure 1A). When imaged in SMLM, rings appear as  
8 homogenously sized, symmetric rings with a thin perimeter (Figure 1B), but also incomplete  
9 rings, arcs, small filamentous structures and aggregates can be found. When we acquired  
10 many cells in SMLM imaging after Cytochalasin D treatment and selected hundreds of rings  
11 from the stained septin structures, we could average them for accurate determination of their  
12 diameter of  $343.9 \pm 5.0$  nm ( $n = 181$ , Figure 1C). We concluded that we could accurately  
13 determine septin ring diameter using this method.

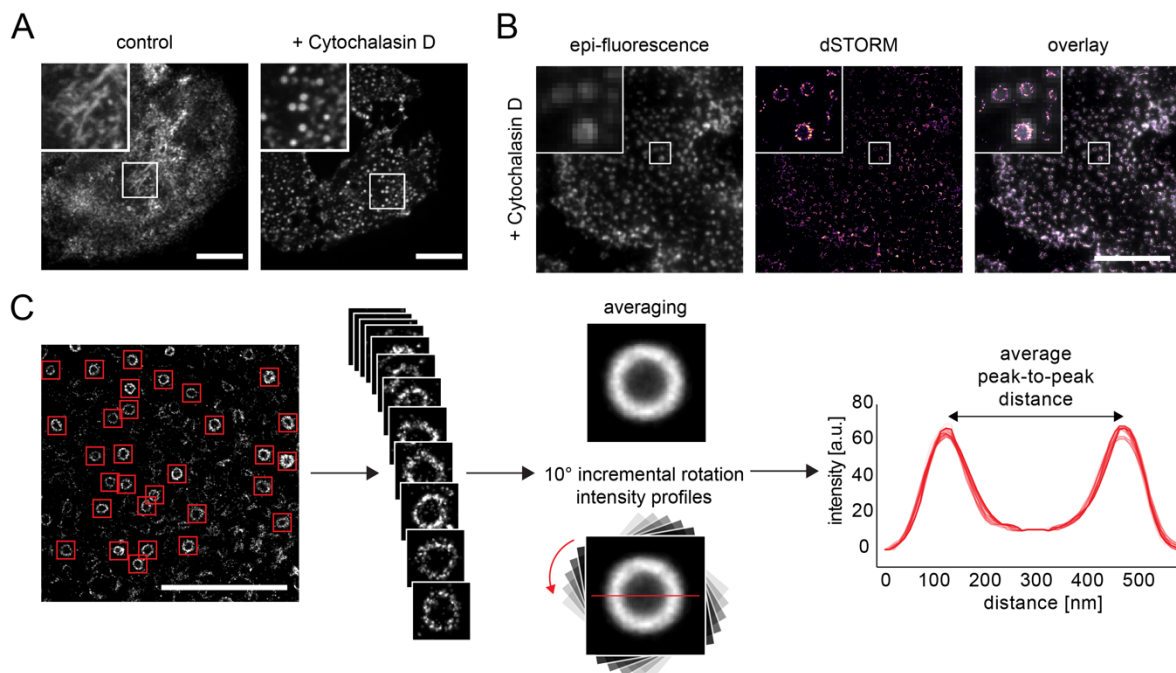

14  
15 **FIGURE 1: Superresolution microscopy assay for quantification of septin ring diameter.**  
16 **(A)** Genome-edited NRK52E cells expressing mEGFP-Septin-2 from both alleles were treated with 5  $\mu$ M  
17 Cytochalasin D for 30 min (or DMSO as control) prior to fixation, resulting in the formation of ring-like  
18 structures. Images of mEGFP fluorescence were taken by spinning disc confocal microscopy. Scale bar: 10  
19  $\mu$ m. **(B)** Septin rings can be readily resolved by single molecule localization-based superresolution  
20 microscopy. NRK52E cells were treated with 5  $\mu$ M Cytochalasin D for 30 min and immunostained against  
21 Septin-7. Images were taken by conventional epi-fluorescence microscopy and by dSTORM. Scale bar: 10  
22  $\mu$ m. **(C)** Scheme of the procedure for the measurement of septin ring diameter. Left to right: Septin rings  
23 from superresolution microscopy images were cropped and averaged. The intensity profile of the averaged  
24 rings was measured at 18 successive 10° incremental rotations and the peak-to-peak distance of all of these  
25 profiles was averaged to return the ring diameter. Scale bar: 5  $\mu$ m.

1 We next aimed to use a widely available and versatile deep learning network to train it to  
2 recognize septin rings. We decided to use the ZeroCostDL4Mic<sup>13</sup> platform which provides free  
3 cloud-based computation and the StarDist<sup>38</sup> network that has been widely used for detection  
4 of cellular structures. However, since it had not been used for ring detection we decided to  
5 test, if it could be trained from scratch to recognize septin rings in SMLM reconstructions. To  
6 do so, we used an annotated dataset of 496 images for training and adjusted parameters of  
7 the StarDist network until we could reliably reach convergence of our model.

8 We next aimed to ask, how annotation bias may affect model learning and the capability of  
9 the model to detect phenotypes strongly different from the wildtype (*wt*) situation in our  
10 images. In cellular SMLM images, septin rings are of variable circularity and completeness in  
11 labeling and occasionally touch. We hence decided to test if higher or lower stringency in  
12 determining a ring would be suitable for training and if masks precisely following the ring  
13 outline would lead to more accurate results. After training, we furthermore asked, whether  
14 the deep learning models would be able to accurately recognize and measure also  
15 significantly smaller or bigger rings.

16 For training, we generated a large amount of SMLM images of cytochalasin D-treated cells,  
17 which we separated into a training set of 496 images and a cellular holdout test dataset of 32  
18 images. We then designed a framework to train deep learning models using six different  
19 annotation strategies and to test the models on the cellular holdout data, the synthetic data  
20 and a biological test case, that is rings devoid of Septin-9 (Figure 2). We asked one human  
21 expert to annotate in three different ways in terms of accuracy of the masks (how does it fit  
22 to the ring) and labeling stringency (how circular and/or continuous do rings have to be) and  
23 after that asked two more human experts to individually annotate with custom masks and  
24 low stringency. A final sixth model was trained using the consensus masks. All trained models  
25 resulted in robust recognition of rings in the cellular test dataset of 32 SMLM images and we  
26 benchmarked the models in terms of precision (fraction of recognized objects that are  
27 present in ground truth), recall (fraction of objects in ground truth that are recognized) and  
28 measured average ring size compared to ground truth (Figure 2). We then went on to run the  
29 models on synthetic SMLM data generated using FluoSim<sup>39</sup> in which ring sizes from 125 to  
30 500 nm were simulated. Finally, we tested the two best performing models on a cellular  
31 example of ring size change, cells in which Septin-9 had been removed from the complex,  
32 leading to significantly smaller rings<sup>37</sup>.

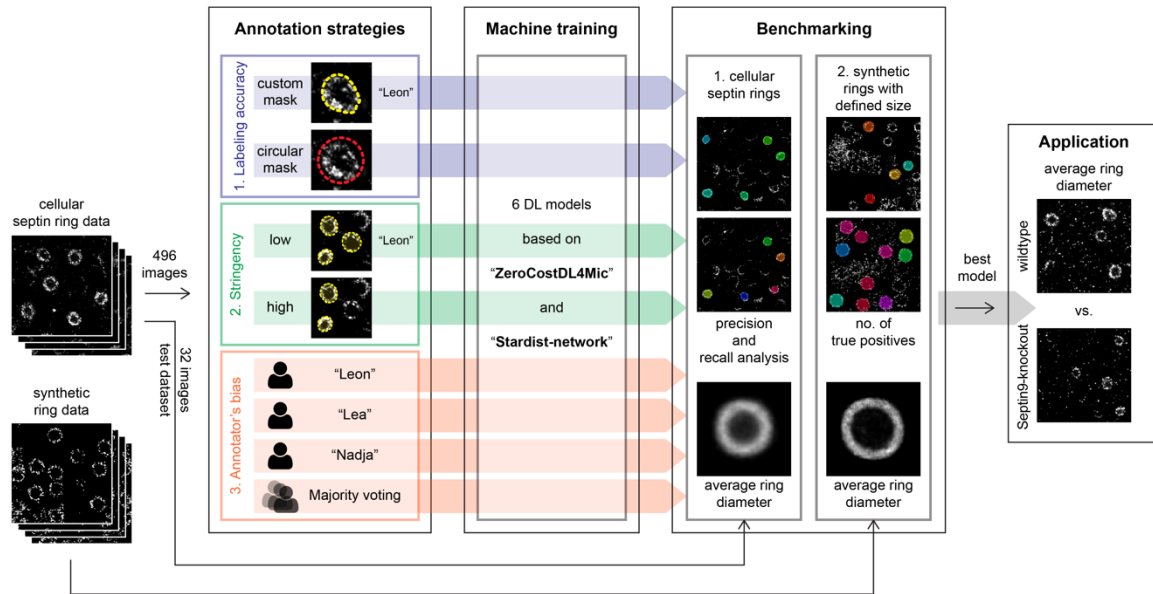

1  
2 **FIGURE 2: General annotation, training and benchmarking strategy for deep learning-assisted septin ring**  
3 **recognition and measurement.**

4 528 dSTORM images of septin rings in NRK52E cells were generated and used for annotation and training  
5 (496 images) or as holdout test dataset (32 ground truth images). To benchmark annotation strategies for  
6 deep learning, images were annotated with different labeling accuracy, annotation stringency, and by  
7 three independent human experts as well as the majority voting thereof. For each annotation strategy we  
8 generated a deep learning models based on the ZeroCostDL4Mic platform using the StarDist network. For  
9 benchmarking, we compared the ability of the models to recognize the rings and to return the correct ring  
10 diameter, both in cellular data and synthetic data with rings of known diameter. The best performing  
11 models were then applied to measure the diameter of septin rings in knockout cells.

12  
13 To evaluate the influence of labeling strategies on recognition by the deep learning models,  
14 a septin biologist recognized septin rings in the cellular test dataset of SMLM data. These we  
15 accepted as *bona fide* septin rings and the resulting dataset and average diameter are in the  
16 following termed ground truth. We then asked a human expert, "Leon", to annotate the  
17 training set according to three different strategies. The first strategy used low stringency in  
18 recognition as a septin ring and required the expert to draw a custom mask around each ring  
19 (Figure 2). The second strategy required the expert to use low stringency in septin ring  
20 recognition, but to use a circular mask or, to be more precise, a convex circular-shape mask  
21 with flexible size that covered the target ring for annotation. The third strategy required the  
22 expert to apply high stringency in selecting rings and to use a custom drawn mask. When the  
23 annotation-specific models were trained and applied to the cellular test dataset, we found  
24 that all models recognized a large fraction of rings reliably when compared to ground truth  
25 albeit with varying precision and recall (Figure 3A). Specifically, the low stringency, custom  
26 mask trained model led to the highest recall with 89.5% of rings found that were present in

1 the ground truth. On the other hand, the high stringency, custom mask trained model led to  
 2 the highest precision with 89% of all recognized rings being true positives, but recall was low.  
 3 The circular mask, low stringency model was of intermediate precision and recall and no  
 4 model showed precision nor recall below 50%. Overall, we concluded that our models could  
 5 reliably recognize septin rings in our cells.

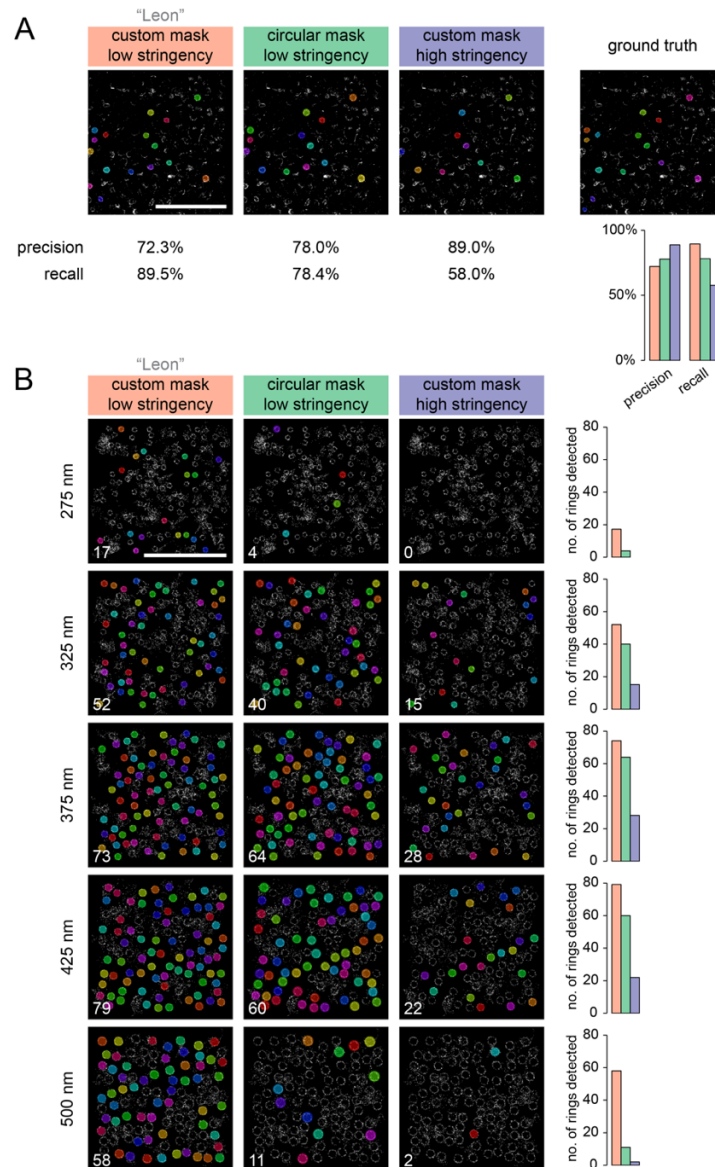

6  
 7 **FIGURE 3: Effect of annotation accuracy and stringency on the ability of deep learning models to detect**  
 8 **rings of different size.**

9 **(A)** Overlay of randomly colored masks of recognized septin ring structures in dSTORM images by 3  
 10 different deep learning models: custom mask and low stringency model (aka "Leon"); circular mask and  
 11 low stringency model; custom mask and high stringency model. The rings detected in a representative  
 12 dSTORM reconstruction from the holdout data are shown together with the respective ground truth.  
 13 Precision and recall calculations are shown below. Scale bar: 5  $\mu$ m. **(B)** Overlay of randomly colored masks  
 14 of recognized ring structures in synthetic dSTORM images with predetermined ring diameters from 275 to  
 15 500 nm as recognized by the deep learning models as in (A). Number of detected rings in each condition is  
 16 shown on the bottom left of each image and plotted on the right. Scale bar: 5  $\mu$ m.

1 When the composition of septin complexes is changed, the diameter of septin rings changes  
2 as well<sup>37</sup>, suggesting that ring size may provide a readout for septin complex assembly and  
3 composition. However, to accurately measure the diameter of rings with different sizes, our  
4 models must recognize rings of even strongly differing diameters for an accurate readout of  
5 ring-size changes. We thus aimed to test whether one of our training strategies would lead to  
6 a bias in the recognition of differently sized rings and only recognize rings in the size-range  
7 found in our untreated cells. To do so, we analyzed a panel of synthetic SMLM test datasets  
8 in which rings of a predefined diameter from 275 to 500 nm, respectively, were present.  
9 When we then applied our models to recognize rings in these synthetic test datasets, we  
10 found striking differences in ring recognition (Figure 3B). While the low stringency, custom  
11 mask model (hereafter called “Leon”) reliably recognized rings in all test cases, the other two  
12 models failed to reliably recognize rings for cases significantly below or above the ring sizes  
13 present in our cells. We concluded that the custom mask, high stringency model (hereafter  
14 called “high stringency”) and the circular mask, low stringency model (hereafter called  
15 “circular mask”) were biased for rings in the size range found in cells and that the training  
16 strategy significantly impacts recognition of septin rings towards superresolution  
17 measurements.

18 Next, we aimed to investigate how three different experts using the same annotation strategy  
19 would influence ring recognition by the resulting models. We asked two additional experts,  
20 “Lea” and “Nadja” to annotate the cellular SMLM training dataset according to the low  
21 stringency, custom mask strategy. From the annotations of the three experts “Leon”, “Lea”  
22 and “Nadja” we furthermore created a “majority voting” annotation. When we then trained  
23 additional models according to the “Lea”, “Nadja” and “majority voting” annotations on our  
24 cellular test dataset, we found that all models exhibited a precision above 60% and a recall  
25 above 80% when compared to ground truth (Figure 4A). The “Nadja” model exhibited an  
26 exceptional recall of 92.8%, but only 60.4% precision, meaning that the “Nadja” model  
27 recognized many objects that were not found in the ground truth. The performance of the  
28 “majority voting” model was very similar to that of the “Leon” model. We concluded that  
29 indeed the specific annotation style of different experts influences ring recognition  
30 significantly. When we next applied the “Lea”, “Nadja” and “majority voting” models to the  
31 panel of synthetic test datasets and compared them to the “Leon” model, we found  
32 significant discrepancies in performance (Figure 4B).



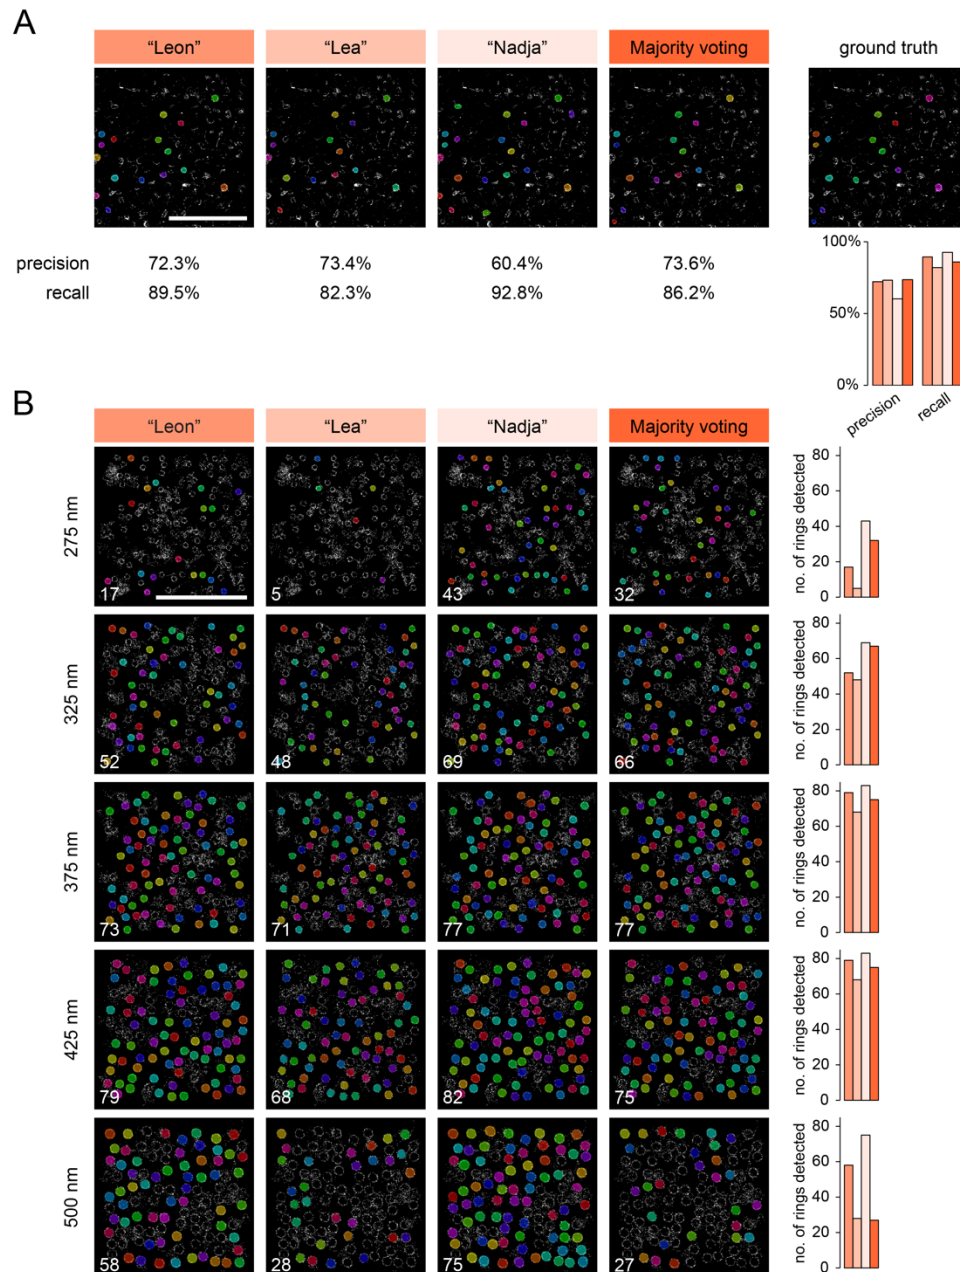

1  
2 **FIGURE 4: Effect of annotator's bias on the ability of deep learning models to recognize rings of different**  
3 **size.**

4 **(A)** Overlay of randomly colored masks of recognized septin ring structures in dSTORM images by 4  
5 different deep learning models: custom mask and low stringency model each for individual annotators  
6 "Leon", "Lea", "Nadja" and for majority voting model. The rings detected in a representative dSTORM  
7 reconstruction from the holdout data are shown together with the respective ground truth. Precision and  
8 recall calculations are shown below. Scale bar: 5  $\mu$ m. **(B)** Overlay of randomly colored masks of recognized  
9 ring structures in synthetic dSTORM images with predetermined ring diameters from 275 to 500 nm as  
10 recognized by the deep learning models as in (A). Number of detected rings in each condition is shown on  
11 the bottom left of each image and plotted on the right. Scale bar: 5  $\mu$ m.  
12

13 Both the "Nadja" and the "majority voting" models reliably outperformed the other models  
14 for smaller rings, while for rings in the range of those found in cells, all models performed

1 equally well. We also tested rings below 275 nm in size (data not shown). For the smallest size  
2 of 125 nm, no model could recognize any rings in synthetic SMLM test datasets. Only the  
3 “Nadja” model could recognize rings reliably from a diameter of 245 nm upward, making it  
4 clearly stand out from the other models. Large (500 nm) rings on the other hand were readily  
5 recognized by the “Nadja” and “Leon” models, while the “Lea” and “majority voting” models  
6 recognized less than half of the rings detected by either the “Nadja” or “Leon” models. We  
7 concluded that the bias introduced by individual annotators has significant consequences on  
8 the recognition of septin rings in SMLM data.

9 We next aimed to ask, to what extent these biases in septin ring annotation would impact the  
10 accurate measurement of septin ring diameter in datasets analyzed by our models. To do so,  
11 we averaged the recognized septin rings for every model and condition and measured the  
12 diameter in nm as described in Figure 1C. When we compared the results of our models on  
13 the cellular SMLM test dataset, we found that all models resulted in a measurement with an  
14 accuracy within 3% of the 343.9 nm found in the ground truth (Figure 5A). We next aimed to  
15 ask, if we could measure differences as small as 5 nm in ring diameter. To do so, we generated  
16 synthetic SMLM test datasets with diameters in 5 nm steps from 350 nm, to 380 nm. When  
17 we ran our models on these datasets and measured the average diameters of the respectively  
18 recognized rings, we found that all models resulted in very accurate measurements of the  
19 respective ring sizes, with errors maximally 3 - 4 nm (Figure 5B). Overall, the highest spread  
20 was found for the “circular mask” and “high stringency” models (Figure 5C), while the  
21 residuals were lowest for the “majority voting” model (Figure 5D). We concluded that all  
22 models were suitable to automatically extract and measure ring size in native cellular SMLM  
23 datasets. When we plotted the measured ring diameter against ground truth ring diameter in  
24 synthetic SMLM test data, we found that all models exhibited excellent linearity over the  
25 range from 275 to 500 nm with  $R^2$ -values above 0.94 (Figure 6A). While thus all models were  
26 very precise in their measurement of ring diameter, a clear dependence of measurement  
27 accuracy on the number of recognized rings was found (Figure 6B), suggesting that the  
28 generation of higher amounts of data could further ameliorate measurement accuracy for the  
29 less well performing models. In Figure 6C, we summarize the data from Figures 3-5 in an  
30 accessible overview according to the z-scores for ring recognition (top) and ring diameter  
31 measurement (bottom). Found values are horizontally z-scored, thus emphasizing differences

- 1 between models even if they may be small in absolute size and describing relative
- 2 performance. However, this overview allows for general observations.

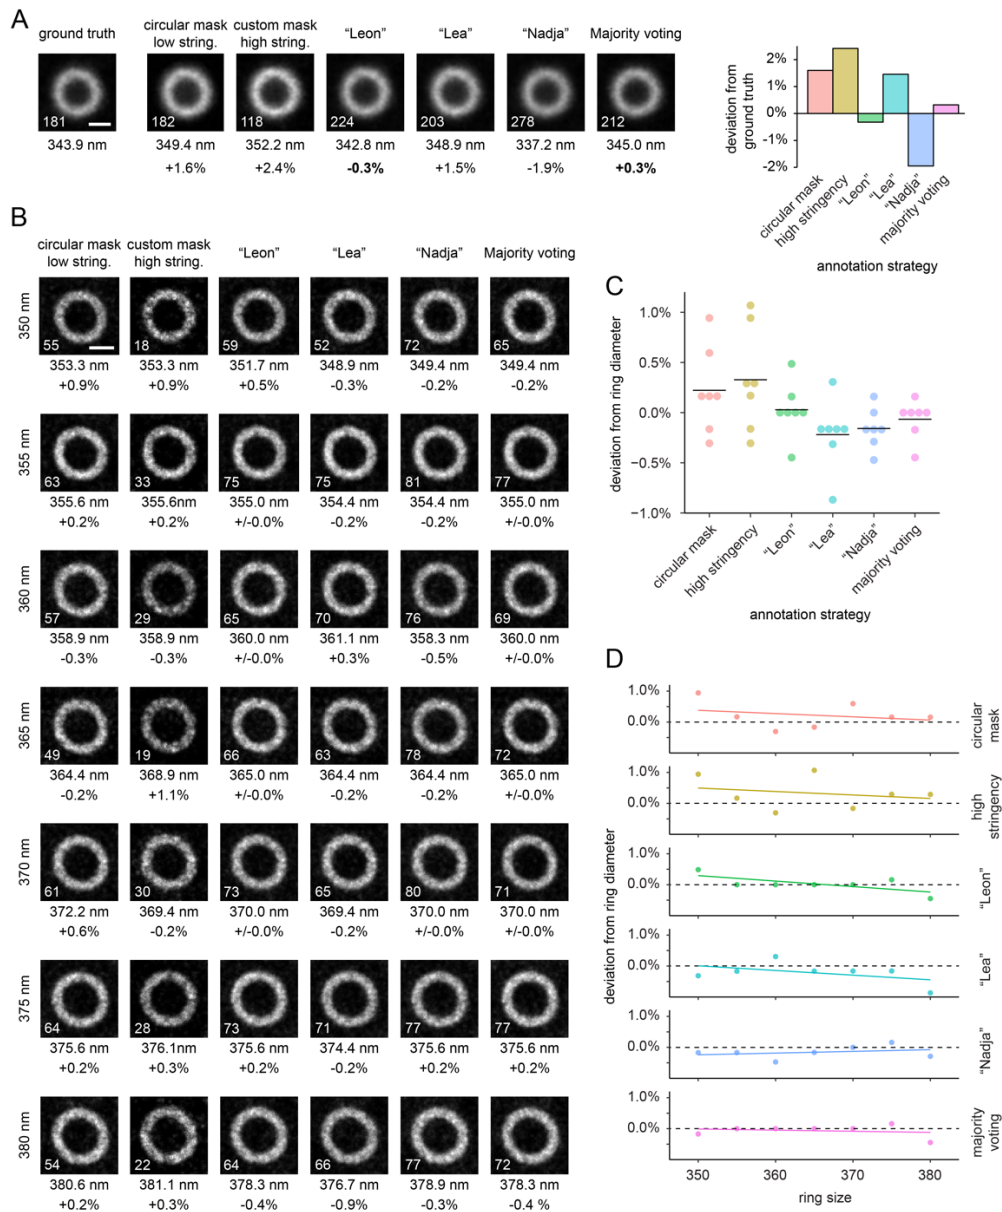

**FIGURE 5: Quantification of the precision of deep learning-based ring measurements.**

(A) Results for septin ring diameter measurements in cellular dSTORM holdout data by the respective deep learning models. Averaged recognized ring images are shown for each model and average ring diameter and deviation from ground truth are shown below the images. Number of rings averaged is shown on the bottom left of each image. The plot on the right shows the deviation of measured septin ring diameter from ground truth for each model in %. Scale bar: 200 nm. (B) Results for septin ring diameter measurements in synthetic dSTORM data of known ring size by respective deep learning models. Underlying ground truth ring diameter is given on the left. Averaged recognized ring images are shown for each model and diameter, average ring diameter and deviation from ground truth are shown below the images. Number of rings averaged is shown on the bottom left of each image. Scale bar: 200 nm. (C) Deviation from respective ground truth ring diameter in percentage points measured for all models and for all 7 ground truth ring diameters shown in (B). Black lines indicate mean deviation. (D) Deviation from respective ground truth ring diameter in percentage plotted against ground truth diameter for all models. Dashed line marks 0% deviation, colored lines show a linear fit.

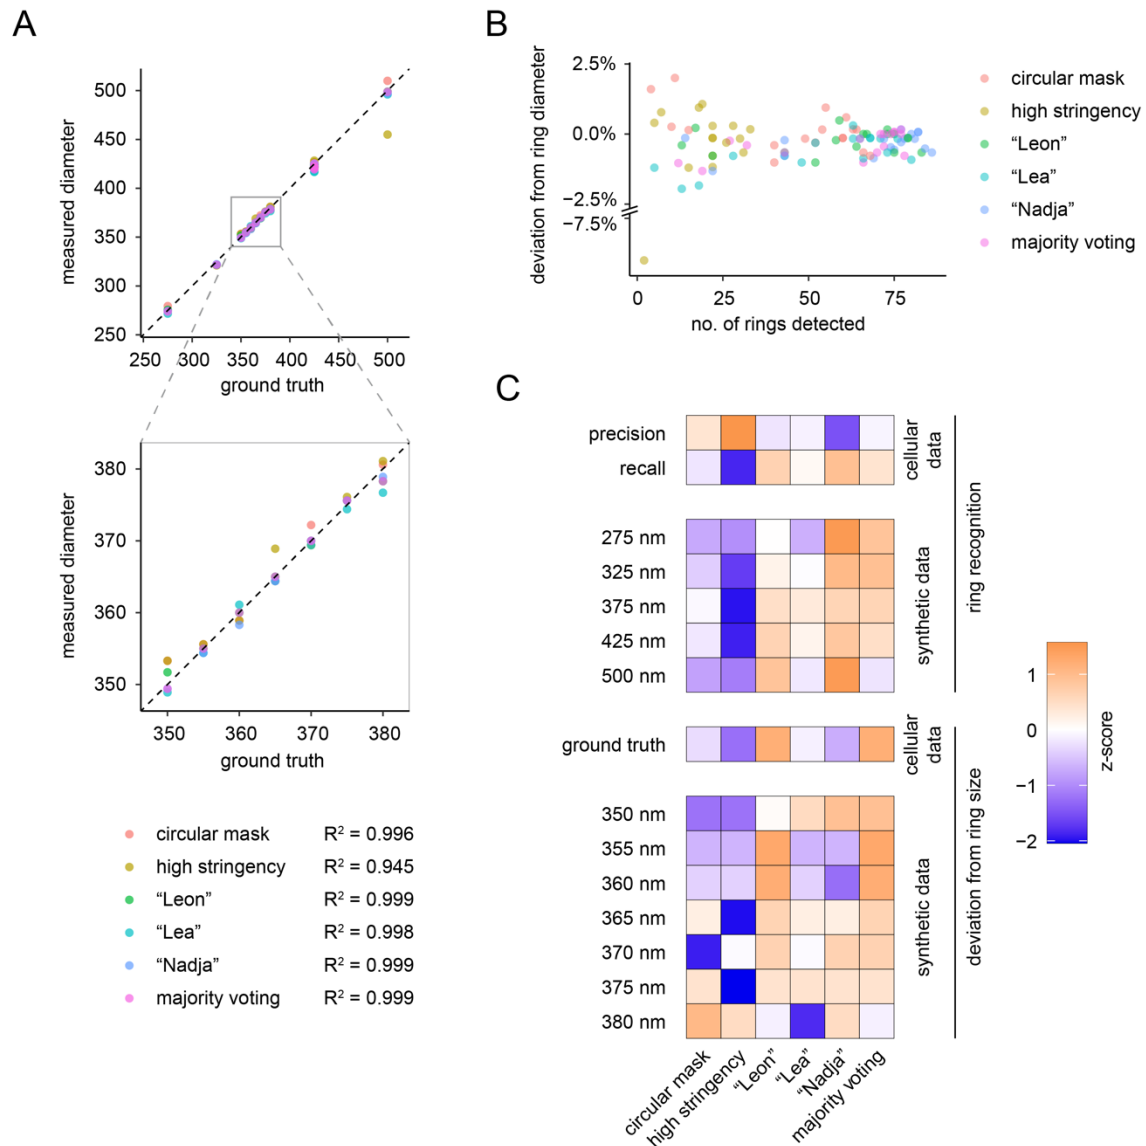

1  
2 **FIGURE 6: Deep learning models accurately and robustly measure septin ring size in dSTORM data.**  
3 **(A)** Measured ring diameter in synthetic dSTORM data plotted against ground truth ring diameter for all  
4 models used in this study. The magnified inset below shows the ring size range exemplified in Figure 5B.  
5 **(B)** Deviation from respective ground truth ring diameter for synthetic rings from 275 nm to 500 nm in  
6 percentage points measured for all models plotted against the respective number of detected rings in each  
7 case. Note that deviation from ground truth decreases with larger number of rings detected. **(C)** Global  
8 analysis of deep learning model performance. From top to bottom: Precision and recall values in cellular  
9 data, number of rings recognized in synthetic data, ring size deviation from ground truth in cellular data  
10 and deviation from ground truth ring size in synthetic data. Heat map shows horizontally z-scored values.  
11

12 It seems that the z-scores for recall and precision, respectively, are correlated with specific  
13 outcomes. The model with the lowest precision, "Nadja", performed best in recognizing rings  
14 of sizes significantly different from those measured in native cells, suggesting that a less  
15 stringent selection of cellular structures as rings allows the model to recognize rings of  
16 different sizes more easily. On the other hand, the model with the highest precision, "high

1 stringency”, did not perform well in synthetic data of ring sizes. For recall on the other hand,  
2 the models that most reliably recognized and most accurately measured rings in the expected  
3 size in cells, showed the highest values (“Leon” and “majority voting”), whereas the models  
4 with low recall (“high stringency” and “circular mask”) exhibited the worst performance. We  
5 concluded that precision and recall are important indicators of model performance, but they  
6 do not suffice to predict experimental outcome.  
7 Having found models that can recognize septin rings of different sizes and accurately measure  
8 their diameter, we decided to test our models on an experimental system, where septin ring  
9 size is known to vary. Septin complexes in mammalian cells are non-polar, palindromic rod-  
10 shaped heterooctamers of around 34 nm length<sup>40–44</sup> that bear two Septin-9 subunits in their  
11 middle. When Septin-9 is removed from cells through RNA interference, septin rings are  
12 known to be smaller<sup>37</sup>. This suggests that ring size is connected to complex length as the  
13 septin complexes created in absence of Septin-9 are known to be hexamers<sup>45</sup> of around 26  
14 nm length. If that is the case, septin ring size should reflect complex size and ring size should  
15 be dependent on the number of complexes in the ring. To ask, whether we can thus estimate  
16 the number of septin complexes in rings from SMLM measurements, we performed SMLM on  
17 embryonic fibroblast cells from *wt* and *Septin-9<sup>-/-</sup>* mice<sup>46</sup>. We found septin rings to be in the  
18 size range of 300 - 400 nm and decided to analyze ring diameter using the “Leon” and the  
19 “majority voting” models as they most accurately measured the average ring diameter in that  
20 range. Indeed, both models readily recognized many rings in measured SMLM data (Figure  
21 7A). In *wt* cells, we measured an average ring diameter of 413.3 nm (“majority voting”) or  
22 425.5 nm (“Leon”). Geometrically, this would translate into 39 septin octamers with a 9.2°  
23 association angle (“Leon”) or 38 octamers with a 9.4° association angle (“majority voting”).  
24 On the other hand, in *Septin-9<sup>-/-</sup>* cells, we measured ring diameters of 334.4 nm (“Leon”) or  
25 335.0 nm (“majority voting”), which would translate into 40 septin hexamers with an 8.9°  
26 association angle for both models (Figure 7B). Strikingly, we could thus determine that septin  
27 ring size in our cells must be determined by the propagation angle of about 9° between  
28 polymerizing septin complexes that would then lead to 40 septin complexes required to form  
29 a ring. We concluded that machine learning supported SMLM superresolution microscopy  
30 could reveal information on the ultrastructural arrangement of septin complexes in rings.

31

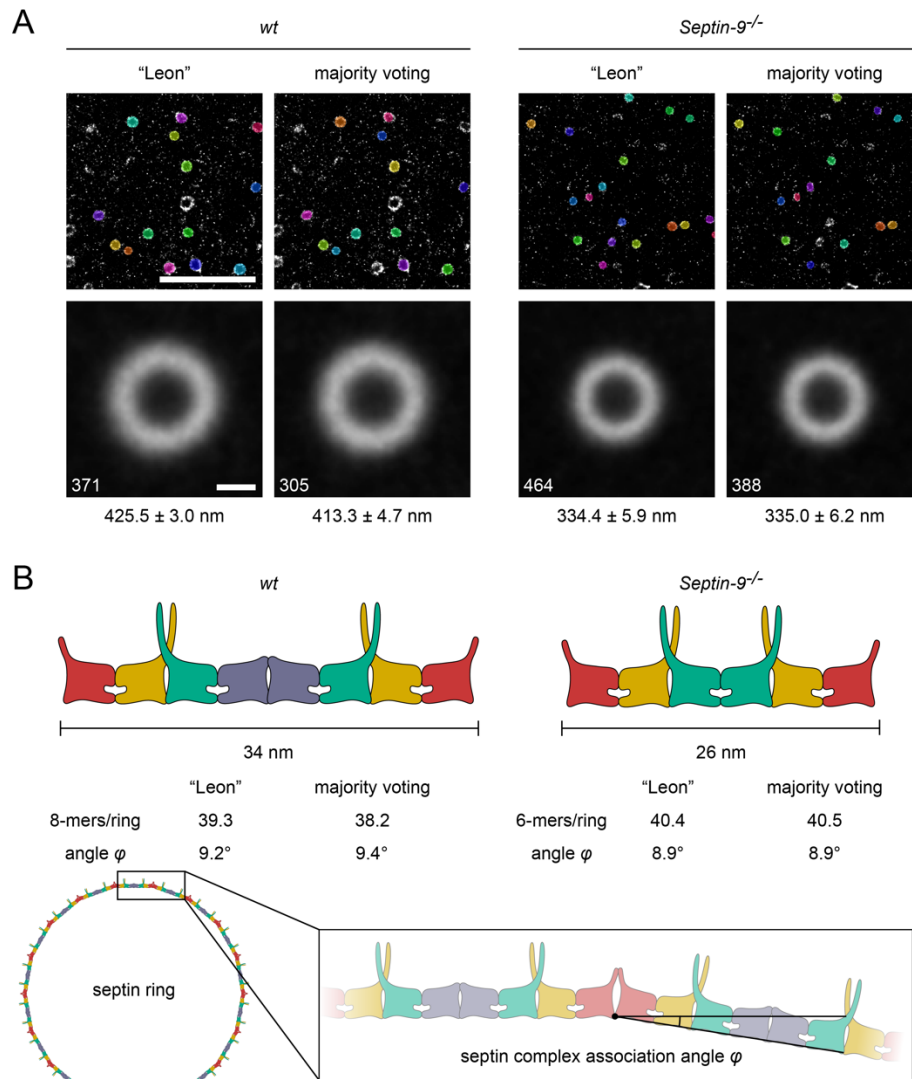

1  
2 **FIGURE 7: Accurate measurement of cellular septin ring size reveals the geometric architecture of septin**  
3 **rings.**

4 **(A)** Septin ring recognition in wild-type (*wt*) and *Septin-9<sup>-/-</sup>* MEFs. Septin ring recognition was performed  
5 with the two deep learning models "Leon" and "majority voting". Representative overlay of randomly  
6 colored masks of recognized septin ring structures in dSTORM images and averaged ring images are shown  
7 for each case. Average ring diameter is shown below. Number of rings averaged is shown on the bottom  
8 left of each image. Scale bars: upper row 5  $\mu$ m, bottom row 200 nm. **(B)** Model of septin ring assembly.  
9 Shown are schematic representations of septin complexes. In mouse fibroblasts the knockout of Septin-9  
10 is thought to remove the central Septin-9 dimer (blue) from the palindromic, heterooctameric complex,  
11 resulting in a heterohexamer. Since the polymerization interface for septin filament assembly is the same  
12 for hexamer and octamer, the rules for assembly of rings should be the same for both complexes and  
13 resulting rings thus smaller. Septin rings measured via deep learning-assisted superresolution microscopy  
14 data analysis in *Septin-9<sup>-/-</sup>* cells are smaller than wildtype rings, consistent with a constant mode of  
15 assembly of rings from  $\sim 40$  complexes with an interface angle  $\phi$  of  $\sim 9^\circ$ .

## 1 Discussion

2 We here developed a deep learning-based assay for the recognition and measurement of  
3 septin ring size in superresolution images of mammalian cells. We trained deep learning  
4 models in several different ways to investigate possible bias. We demonstrate that the outline  
5 of the annotation mask, the stringency in annotation, and the generation of a consensus  
6 between experts influence the outcome of both the accuracy of measurements as well as  
7 robustness in detection of target structures. For example, we found that some of the models  
8 were more sensitive to changes in ring size than others. Especially if the models are supposed  
9 to recognize structures with a different phenotype in cells, such bias can be decisive. This  
10 suggests that benchmarking on simulated data covering the whole phenotypic range provides  
11 an excellent means to control the reliability of the deep learning models.

12 So far, deep learning models for the recognition of fluorescence labeled structures in cells  
13 have mostly been used to recognize structures of low or highly predictable variability such as  
14 cellular nuclei<sup>17,38,47</sup>. The correct recognition of different phenotypes is, however, an essential  
15 property of data analysis models in experimental biology. To ensure this is possible for our  
16 models, we use a wide array of synthetic SMLM data to test our models on the capability to  
17 recognize phenotypes that are different from what is observed in *wt* cells. Our data suggest  
18 that very stringent criteria in the selection of native rings may lead to overfitting and thus be  
19 detrimental to the recognition of rings of different size in cells, as observed for the “high  
20 stringency” and likely also the “Lea” model. On the other hand, less stringent criteria lead to  
21 a slightly lower accuracy in the measurement of ring diameter, as observed for the “Nadja”  
22 model. From all of our models, the “majority voting” model belonged to the best performing  
23 models both for recognizing *wt* cellular rings as well as for recognizing rings of significantly  
24 different size. It also resulted in very low error in ring size determination. Our data agree with  
25 previous observations that consensus or majority voting models often perform better than  
26 models based on individual annotators<sup>48</sup>.

27 Our data provide insight into the requirements in experimental design of deep learning-based  
28 data analysis pipelines of superresolution microscopy specifically and into the generation of  
29 robust deep learning models in general. We furthermore provide a robust quantitative assay  
30 for the investigation of subresolution structures assembled from an essential cytoskeletal  
31 component, the septins.

1 Our finding that the septin ring diameter both in Septin-9 *wt* and in Septin-9<sup>-/-</sup> cells can be  
2 explained by 40 complexes adding an angle of 9° each towards ring closure suggests that  
3 superresolution microscopy of septin complexes may be useful as a readout to investigate  
4 septin complex assembly in the future. That the angle in Septin-9 containing complexes is the  
5 same as in Septin-9-free complexes suggests that the 9° propagation angle is not introduced  
6 at the center of the hexamer, but rather at the polymerization interface between terminal  
7 Septin-2-group septins in adjacent complexes. In baker's yeast *Saccharomyces cerevisiae*, it is  
8 known that the terminal septin in the heterooctamer, here *cdc11* or *shs1*, determines the  
9 degree to which septin filaments bend. Straight filaments form with *cdc11* and ring-like  
10 filaments form with *shs1* at the termini of the complex<sup>49</sup>. It is tempting to speculate that the  
11 Septin-2-group septins, which occupy the termini of the mammalian octamer may play a  
12 similar role. It is known that the Septin-2 group members (Septin-1, Septin-2, Septin-4, and  
13 Septin-5) can replace one another at position X in a Septin-X/6/7/7/6/X heterohexamer  
14 biochemically<sup>50</sup> and that they exhibit non-overlapping functions<sup>36,51-53</sup> that may be a result of  
15 their mode of filament assembly. In the future, our assay will allow for investigations into  
16 potential influences of complex-terminal septin subunits on ring-size and thus septin  
17 polymerization properties.



## 1 **Materials and methods**

2

### 3 **Cell culture and immunostaining.**

4 The NRK52E-Septin-2-GFP<sup>EN/EN</sup> genome edited cell line expressing mEGFP-Septin2 from both  
5 alleles was generated as described<sup>54</sup>. All steps in the following were carried out at room  
6 temperature unless otherwise stated. NRK52E-Septin-2-GFP<sup>EN/EN</sup>, Septin-9<sup>c/c</sup> (*wt*) or Septin-9<sup>-</sup>  
7 <sup>-</sup> (knockout) mouse embryonic fibroblasts<sup>46</sup> were seeded on round coverslips (thickness no.  
8 1.5) coated with 0.01% (w/v) poly-L-Lysine solution (Sigma) and grown in DMEM (Gibco,  
9 Thermo Fisher Scientific) supplemented with 10% (v/v) fetal calf serum, 2 mM L-Glutamine  
10 (Gibco, Thermo Fisher Scientific) and 100 U/ml penicillin–streptomycin (Sigma) at 37 °C and  
11 5% CO<sub>2</sub> in a humidified incubator. The next day, cells were treated with 5 μM Cytochalasin D  
12 for 30 min at 37 °C in DMEM without supplements to induce septin ring formation. Cells were  
13 fixed in 4% (w/v) paraformaldehyde solution in PHEM buffer (60 mM PIPES-KOH pH 6.9, 25  
14 mM HEPES, 10 mM EGTA, 1 mM MgCl<sub>2</sub>) for 15 min at 37°C. 1.5. Fixation was quenched with  
15 50 mM NH<sub>4</sub>Cl in PHEM buffer for 7 min. Cells were permeabilized using 0.25% (v/v) TritonX-  
16 100 in PHEM buffer for 5 min and then blocked with Image-iT FX signal enhancer (Invitrogen,  
17 Thermo Fisher Scientific) for 30 min before blocking for 1h with 4% (v/v) horse serum, 1%  
18 (w/v) BSA and 0.1% (v/v) TritonX-100 in PHEM buffer. The sample was then stained with 10  
19 μg/ml anti-GFP nanobody coupled to Alexa Fluor-647 at 4°C overnight or with rabbit anti-  
20 human-Septin-7 IgG (1:500, IBL America) overnight and subsequently with goat anti-rabbit  
21 Alexa Fluor-647 conjugate IgG-Fab (1:500, Thermo Fisher Scientific) for 45 min in PHEM buffer  
22 supplemented with 1% (w/v) BSA and 0.1% (v/v) TritonX-100. Samples were post-fixed in 4%  
23 (w/v) paraformaldehyde in PHEM buffer for 10 minutes and quenched as described above.  
24 For the cellular septin ring dataset NRK52E 13 samples were prepared out of which 6 were  
25 stained with anti-GFP nanobody and 7 were stained with anti-Septin-7 antibody resulting in  
26 288 and 240 images, respectively. Out of these 528 images 32 were randomly selected to be  
27 used as test dataset while the remaining 496 images were used for training of the deep  
28 learning models. For the Septin-9<sup>c/c</sup> or Septin-9<sup>-</sup> mouse embryonic fibroblasts 96 images  
29 were generated from each sample.

30

31

## 1 **Spinning disc confocal microscopy.**

2 Images were acquired on an inverted IX71 microscope (Olympus) equipped with a CSU-X1  
3 spinning disk unit (Yokogawa) and an iLas laser illumination system (Gataca Systems) with a  
4 491 nm laser for illumination. A 60x NA 1.42 oil objective (Olympus) was used, and images  
5 were taken with an ORCA Flash 4.0LT sCMOS camera (Hamamatsu). The System was operated  
6 using the software MetaMorph.

7

## 8 **dSTORM of septin rings.**

9 Coverslips with immunostained samples were mounted in a mounting chamber and filled  
10 with GLOX + BME buffer (4% (w/v) glucose, 140 mM  $\beta$ -mercaptoethanol, 10 mM NaCl, 200  
11 mM Tris-HCl pH 8, 500  $\mu$ g/ml glucose oxidase, 40  $\mu$ g/ml glucose catalase and 10% (v/v)  
12 glycerol). dSTORM images were acquired on a Vutara 352 superresolution microscope  
13 (Bruker) equipped with an ORCA Flash4.0 sCMOS camera (Hamamatsu) and a 60x NA 1.49  
14 ApoN oil immersion total internal reflection fluorescence (TIRF) objective (Olympus), yielding  
15 a pixel size of 98 nm. Data were acquired in TIRF illumination at a laser power density of  $\sim$ 35  
16 kW/cm<sup>2</sup> using a 639 nm laser. dSTORM images were reconstructed from 10,000 images taken  
17 with an exposure of 20 ms per image. Reference epi-fluorescence images were taken with an  
18 exposure of 500 ms and low laser power density. Images were reconstructed with a pixel size  
19 of 10 nm using the software Vutara SRX v.6.04.14.

20

## 21 **Generation of synthetic dSTORM ring data.**

22 Synthetic storm data was generated using FluoSim<sup>39</sup>. Geometry files were created using a  
23 python script, which generates non-overlapping randomly spaced rings with a thickness of  
24 150 nm. Each geometry file contains 100 rings of the same radius. To generate background  
25 geometry files a python script was used, which creates 100 overlapping irregular  
26 icosahedrons per geometry with random side lengths of up to 500 nm. The geometry files  
27 were imported into FluoSim. To mimic the immunostaining process 10000 dyes were  
28 distributed randomly onto the geometries. Single-molecule localization reconstructions were  
29 then generated using parameters which resemble the experimental STORM imaging  
30 parameters (pixel size 10 nm, switch on rate 0.027 Hz, switch off rate 10 Hz, simulation time  
31 step 20 ms, localization precision 10 nm, 10000 frames).

32

## 1 **Data preparation for deep learning.**

2 The deep learning trainings have been carried out on 496 cellular SMLM reconstructed images  
3 of size 1024 by 1024 pixels rendered at a pixel size of 10 nm, where the number of septin  
4 rings per image was ranging from 0 to ~30 rings. Each training image has been manually  
5 annotated using each of the six different annotation strategies resulting in six different paired  
6 sets of raw and corresponding mask images. The manual annotation was performed using the  
7 Fiji plugin Labkit (<https://imagej.net/plugins/labkit/>). This way, our annotators manually drew  
8 masks around each potential septin ring resulting in mask images in which all pixels within an  
9 annotated ring were labeled with a distinct integer, while background pixels were labeled  
10 with zero. Based on the model as well as the number of septin-like rings in the image, a few  
11 to tens of seconds are spent on manual annotation of a single image. Moreover, the “majority  
12 voting” annotation - where the certainty level of the labels is high - is created from the  
13 annotations made by the three expert annotators. A given pixel in the “majority voting” label  
14 image is considered as a part of a mask only if it has been annotated by at least two individual  
15 annotators, otherwise it is considered background. The unseen test dataset comprising 32  
16 cellular SMLM images was manually annotated by a septin biologist and the result was used  
17 as ground truth for further benchmarking of the models.

18

## 19 **Deep learning model training and parameter settings.**

20 For septin ring recognition, we trained each of the six models from scratch with the same  
21 cellular SMLM image data paired with the corresponding set of model specific mask images.  
22 To do so, we selected the 2D variant of the StarDist<sup>38</sup> machine learning network with the U-  
23 Net structure as its core. We trained the StarDist network on the ZeroCostDL4Mic platform<sup>13</sup>  
24 as it provided simple access to a range of popular deep learning networks including StarDist.  
25 The hyperparameters of the StarDist structure, originally designed for cell and nuclei  
26 segmentation problems, were tuned in our implementations for the recognition of rings in  
27 SMLM image data. To do so, we adjusted the ZeroCostDL4Mic StarDist notebook to enable a  
28 long-running grid search for hyperparameter optimization as well as offline data analysis. The  
29 grid search yielded different sets of hyperparameters when optimizing for recall and  
30 precision, of which we chose the one that ensured a reasonable balance between the two  
31 criteria in all the six trained models. Table 1 summarizes the values of the StarDist network’s  
32 hyperparameters used in our experiments. In order to avoid adding another cause for bias,

1 no augmentation was used for training. Furthermore, transfer learning is not considered in  
2 our work. The batch size was set to 8 and a mae function was chosen as the loss function. Of  
3 the training dataset, 10% were used as a validation set to monitor possible overfitting during  
4 training.

5 To guarantee a fair comparison of the six different annotation strategies, we trained each pair  
6 of raw images and corresponding mask images on the same StarDist network with fixed  
7 hyperparameters. In order to train the StarDist network, the key adopted python packages  
8 included tensorflow (v 0.1.12), Keras (v 2.3.1), csbdeep (v 0.6.3), numpy (v 1.19.5), and cuda  
9 (v 11.1.105). The training process has been accelerated using a Tesla P100 GPU and depending  
10 on the model it took between 123 to 161 minutes.

11

12

**Table 1.** Hyperparameter configuration of the Stardist network used in this research

| Parameter             | Value     |
|-----------------------|-----------|
| Number of epochs      | 200       |
| Patch size            | 1024x1024 |
| Batch size            | 8         |
| Percentage validation | 10        |
| n rays                | 32        |
| Grid parameter        | 2         |
| Initial learning rate | 0.0003    |
| Augmentation          | No        |
| Transfer learning     | No        |

13

14

### 15 **Ring recognition by means of trained models.**

16 For benchmarking, we ran the six trained models on the cellular test dataset and the synthetic  
17 ring dataset using the ZeroCostDL4Mic platform. For the ring recognition in the Septin9<sup>c/c</sup> and  
18 Septin9<sup>-/-</sup> cell data we exported the models from the ZeroCostDL4Mic platform and ran them  
19 using the StarDist Fiji plugin. The outputs generated by the models were mask images of the  
20 same size of the corresponding test image.

## 1 **Ring averaging and diameter measurement.**

2 To generate average ring images, the model output mask images were converted into binary  
3 images using Fiji. The centers of the individual ring masks were calculated and fixed-size  
4 bounding boxes were created around the center points. Bounding boxes touching the image  
5 borders were excluded from further measurements. The bounding box ROIs were then  
6 together with the corresponding images fed to CellProfiler<sup>47</sup> to extract per-ring crops from  
7 the corresponding raw images. Using a custom written Fiji macro, we measured the average  
8 ring diameter as follows: the ring crops per condition were averaged and the diameter was  
9 determined by measuring horizontal line profiles with a line thickness of 1 pixel on 18  
10 successive 10° rotations of the image (see Figure 1C). In each of these 18 intensity plots the  
11 peak-to-peak distance was measured and then averaged to calculate the ring diameter.

12

## 13 **Calculation of septin ring geometry**

14 The septin ring circumference  $C$  was calculated based on the formula  $C = \pi*d$  where  $d$  is the  
15 measured ring diameter. The circumference was then divided by the approximate  
16 periodicity length of heterooctameric or heterohexameric complexes as can be found in  
17 filaments including the Septin-2-NC interface gap in the open conformation as predicted by  
18 pdb structure data (pdb codes: 2QAG, 7M6J, 6UQQ, 5CYO). This was in line with the observed  
19 periodicity length of the heterooctameric complex as found in filamentous septin  
20 assemblies<sup>40–44</sup>. The septin complex association angle was calculated by dividing 360° by the  
21 number of septin complexes found in the ring.

22

## 23 **Statistics**

24 We used the precision metric to show how relevant the recognized objects are in comparison  
25 to the septin rings in the ground truth. It was calculated as  $TP / (TP + FP)$ , where  $TP$  stands for  
26 the number of true positives and  $FP$  is the number of falsely recognized objects. Recall, on the  
27 other hand, was used to show how well the recognized objects match the septin rings in the  
28 ground truth. Thus, it was calculated as  $TP / (TP + FN)$ , where  $FN$  is the number of relevant  
29 septin rings in the ground truth that were not recognized by the models. Both measures fall  
30 in the [0%, 100%] interval, with higher values corresponding to better septin ring recognition  
31 performance.  $R^2$  values were calculated in R (R Project) using the “lm” function. z-score values  
32 were calculated across the six models using the formula  $z = (x-\mu)/\sigma$ , where  $x$  is the variable

1 (recall, precision, ring diameter, no of rings detected),  $\mu$  is the mean over the group of  
2 variables of all six models and  $\sigma$  is the standard deviation from the mean.

3

#### 4 **Acknowledgements**

5 This work was funded by the Deutsche Forschungsgemeinschaft (DFG, German Research  
6 Foundation) as part of TRR 186 (Project Number 278001972) and SFB 958 and core funding  
7 through Freie Universität Berlin. SMLM imaging was performed in the Core Facility  
8 BioSupraMol facility of Freie Universität Berlin. The authors wish to thank Richard C. Garratt  
9 for help with the measurement of the septin heterooctamer dimensions based on pdb  
10 structures. Furthermore, the authors wish to thank all members of the Ewers laboratory for  
11 helpful discussions.

12

#### 13 **References**

- 14 1. Sochacki, K. A., Dickey, A. M., Strub, M.-P. & Taraska, J. W. Endocytic proteins are  
15 partitioned at the edge of the clathrin lattice in mammalian cells. *Nat Cell Biol* (2017)  
16 doi:10.1038/ncb3498.
- 17 2. Mund, M. *et al.* Systematic Nanoscale Analysis of Endocytosis Links Efficient Vesicle  
18 Formation to Patterned Actin Nucleation. *Cell* **174**, 884-896.e17 (2018).
- 19 3. Szymborska, A. *et al.* Nuclear Pore Scaffold Structure Analyzed by Super-Resolution  
20 Microscopy and Particle Averaging. *Science* (2013) doi:10.1126/science.1240672.
- 21 4. Gunzenhäuser, J., Olivier, N., Pengo, T. & Manley, S. Quantitative Super-Resolution  
22 Imaging Reveals Protein Stoichiometry and Nanoscale Morphology of Assembling HIV-  
23 Gag Virions. *Nano Lett* (2012) doi:10.1021/nl3021076.
- 24 5. Gambarotto, D. *et al.* Imaging cellular ultrastructures using expansion microscopy (U-  
25 ExM). *Nat Methods* 1–11 (2018) doi:10.1038/s41592-018-0238-1.

- 1 6. Willig, K. I., OO, R. S., Westphal, V., Jahn, R. & Hell, S. W. STED microscopy reveals that  
2 synaptotagmin remains clustered after synaptic vesicle exocytosis. *Nature* **440**, 935–939  
3 (2006).
- 4 7. Balzarotti, F. *et al.* Nanometer resolution imaging and tracking of fluorescent molecules  
5 with minimal photon fluxes. *Science* (2016) doi:10.1126/science.aak9913.
- 6 8. Sommer, C. & Gerlich, D. W. Machine learning in cell biology - teaching computers to  
7 recognize phenotypes. *J Cell Sci* **126**, 5529–5539 (2013).
- 8 9. Piccinini, F. *et al.* Advanced Cell Classifier: User-Friendly Machine-Learning-Based  
9 Software for Discovering Phenotypes in High-Content Imaging Data. *Cell Syst* **4**, 651-  
10 655.e5 (2017).
- 11 10. Jones, T. R. *et al.* Scoring diverse cellular morphologies in image-based screens with  
12 iterative feedback and machine learning. *Proc Natl Acad Sci USA* **106**, 1826–1831 (2009).
- 13 11. Held, M. *et al.* CellCognition: time-resolved phenotype annotation in high-throughput  
14 live cell imaging. *Nat Methods* **7**, 747–754 (2010).
- 15 12. Morone, D., Marazza, A., Bergmann, T. J. & Molinari, M. Deep learning approach for  
16 quantification of organelles and misfolded polypeptide delivery within degradative  
17 compartments. *MBoC* **31**, 1512–1524 (2020).
- 18 13. von Chamier, L. *et al.* Democratising deep learning for microscopy with ZeroCostDL4Mic.  
19 *Nat Commun* **12**, 2276 (2021).
- 20 14. Lucas, A. M. *et al.* Open-source deep-learning software for bioimage segmentation.  
21 *MBoC* **32**, 823–829 (2021).
- 22 15. Gómez-de-Mariscal, E. *et al.* DeepImageJ: A user-friendly environment to run deep  
23 learning models in ImageJ. *Nat Methods* **18**, 1192–1195 (2021).

- 1 16. Mathis, A. *et al.* DeepLabCut: markerless pose estimation of user-defined body parts  
2 with deep learning. *Nat Neurosci* 1–12 (2018) doi:10.1038/s41593-018-0209-y.
- 3 17. Falk, T. *et al.* U-Net: deep learning for cell counting, detection, and morphometry. *Nat*  
4 *Methods* 1–10 (2019) doi:10.1038/s41592-018-0261-2.
- 5 18. Moen, E. *et al.* Deep learning for cellular image analysis. *Nat Methods* 1–14 (2019)  
6 doi:10.1038/s41592-019-0403-1.
- 7 19. Sommer, C., Hoefler, R., Samwer, M. & Gerlich, D. W. A deep learning and novelty  
8 detection framework for rapid phenotyping in high-content screening. *Mol Biol Cell* **28**,  
9 3428–3436 (2017).
- 10 20. Stringer, C., Wang, T., Michaelos, M. & Pachitariu, M. Cellpose: a generalist algorithm for  
11 cellular segmentation. *Nat Methods* 1–21 (2020) doi:10.1038/s41592-020-01018-x.
- 12 21. Isensee, F., Jaeger, P. F., Kohl, S. A. A., Petersen, J. & Maier-Hein, K. H. nnU-Net: a self-  
13 configuring method for deep learning-based biomedical image segmentation. *Nat*  
14 *Methods* **18**, 203–211 (2021).
- 15 22. Zhang, J. *et al.* PIXER: an automated particle-selection method based on segmentation  
16 using a deep neural network. *BMC Bioinformatics* **20**, 41 (2019).
- 17 23. Weigert, M. *et al.* Content-aware image restoration: pushing the limits of fluorescence  
18 microscopy. *Nat Methods* **15**, 1090–1097 (2018).
- 19 24. Fang, L. *et al.* Deep learning-based point-scanning super-resolution imaging. *Nat*  
20 *Methods* **18**, 406–416 (2021).
- 21 25. Speiser, A. *et al.* Deep learning enables fast and dense single-molecule localization with  
22 high accuracy. *Nat Methods* **18**, 1082–1090 (2021).
- 23 26. Nehme, E. *et al.* DeepSTORM3D: dense 3D localization microscopy and PSF design by  
24 deep learning. *Nat Methods* 1–10 (2020) doi:10.1038/s41592-020-0853-5.



- 1 27. Ouyang, W., Aristov, A., Lelek, M., Hao, X. & Zimmer, C. Deep learning massively  
2 accelerates super-resolution localization microscopy. *Nat Biotechnol* **36**, 460–468  
3 (2018).
- 4 28. Heydarian, H. *et al.* 3D particle averaging and detection of macromolecular symmetry in  
5 localization microscopy. *Nat Commun* **12**, 2847 (2021).
- 6 29. Sieben, C., Banterle, N., Douglass, K. M., Gönczy, P. & Manley, S. Multicolor single-  
7 particle reconstruction of protein complexes. *Nat Methods* 1–9 (2018)  
8 doi:10.1038/s41592-018-0140-x.
- 9 30. Mennella, V. *et al.* Subdiffraction-resolution fluorescence microscopy reveals a domain  
10 of the centrosome critical for pericentriolar material organization. *Nat Cell Biol* **14**,  
11 1159–1168 (2012).
- 12 31. Mostowy, S. & Cossart, P. Septins: the fourth component of the cytoskeleton. *Nat Rev*  
13 *Mol Cell Biol* **13**, 183–194 (2012).
- 14 32. Weirich, C. S., Erzberger, J. P. & Barral, Y. The septin family of GTPases: architecture and  
15 dynamics. *Nat Rev Mol Cell Biol* **9**, 478–489 (2008).
- 16 33. Kinoshita, M., Field, C. M., Coughlin, M. L., Straight, A. F. & Mitchison, T. J. Self- and  
17 actin-templated assembly of Mammalian septins. *Dev Cell* **3**, 791–802 (2002).
- 18 34. Sellin, M. E., Holmfeldt, P., Stenmark, S. & Gullberg, M. Microtubules support a disc-like  
19 septin arrangement at the plasma membrane of mammalian cells. *Mol Biol Cell* (2011)  
20 doi:10.1091/mbc.E11-09-0754.
- 21 35. Hu, J. *et al.* Septin-driven coordination of actin and microtubule remodeling regulates  
22 the collateral branching of axons. *Curr Biol* **22**, 1109–1115 (2012).
- 23 36. Kaplan, C., Steinmann, M., Zapiorkowska, N. A. & Ewers, H. Functional Redundancy of  
24 Septin Homologs in Dendritic Branching. *Front Cell Dev Biol* **5**, 11 (2017).

- 1 37. Kim, M. S., Froese, C. D., Estey, M. P. & Trimble, W. S. SEPT9 occupies the terminal  
2 positions in septin octamers and mediates polymerization-dependent functions in  
3 abscission. *J Cell Biol* **195**, 815–826 (2011).
- 4 38. Schmidt, U., Weigert, M., Broaddus, C. & Myers, G. Cell Detection with Star-convex  
5 Polygons. *arXiv:1806.03535 [cs]* **11071**, 265–273 (2018).
- 6 39. Lagardère, M., Chamma, I., Bouilhol, E., Nikolski, M. & Thoumine, O. FluoSim: simulator  
7 of single molecule dynamics for fluorescence live-cell and super-resolution imaging of  
8 membrane proteins. *Sci Rep* 1–14 (2020) doi:10.1038/s41598-020-75814-y.
- 9 40. Bertin, A. *et al.* Saccharomyces cerevisiae septins: supramolecular organization of  
10 heterooligomers and the mechanism of filament assembly. *Proc Natl Acad Sci USA* **105**,  
11 8274–8279 (2008).
- 12 41. DeMay, B. S. *et al.* Septin filaments exhibit a dynamic, paired organization that is  
13 conserved from yeast to mammals. *J Cell Biol* **193**, 1065–1081 (2011).
- 14 42. Frazier, J. A. *et al.* Polymerization of purified yeast septins: evidence that organized  
15 filament arrays may not be required for septin function. *J Cell Biol* **143**, 737–749 (1998).
- 16 43. Kaplan, C. *et al.* The absolute arrangement of subunits in cytoskeletal septin filaments in  
17 cells measured by fluorescence microscopy. *Nano Lett* (2015)  
18 doi:10.1021/acs.nanolett.5b00693.
- 19 44. Bertin, A. *et al.* Phosphatidylinositol-4,5-bisphosphate promotes budding yeast septin  
20 filament assembly and organization. *Journal of Molecular Biology* **404**, 711–731 (2010).
- 21 45. Sellin, M. E., Stenmark, S. & Gullberg, M. Mammalian SEPT9 isoforms direct  
22 microtubule-dependent arrangements of septin core heteromers. *Mol Biol Cell* **23**,  
23 4242–4255 (2012).

- 1 46. Füchtbauer, A. *et al.* Septin9 is involved in septin filament formation and cellular  
2 stability. *Biol Chem* **392**, 769–777 (2011).
- 3 47. Carpenter, A. E. *et al.* CellProfiler: image analysis software for identifying and  
4 quantifying cell phenotypes. *Genome Biol* **7**, R100 (2006).
- 5 48. Segebarth, D. *et al.* On the objectivity, reliability, and validity of deep learning enabled  
6 bioimage analyses. *eLife* **9**, e59780 (2020).
- 7 49. Garcia, G. *et al.* Subunit-dependent modulation of septin assembly: Budding yeast septin  
8 Shs1 promotes ring and gauze formation. *J Cell Biol* (2011) doi:10.1083/jcb.201107123.
- 9 50. Kinoshita, M. Assembly of mammalian septins. *J. Biochem.* **134**, 491–496 (2003).
- 10 51. Song, K. *et al.* A SEPT1-based scaffold is required for Golgi integrity and function. *J Cell*  
11 *Sci* **132**, jcs225557 (2019).
- 12 52. Ihara, M. *et al.* Cortical organization by the septin cytoskeleton is essential for structural  
13 and mechanical integrity of mammalian spermatozoa. *Dev Cell* **8**, 343–352 (2005).
- 14 53. Asada, A. *et al.* Neuronal expression of two isoforms of mouse Septin 5. *J Neurosci Res*  
15 **88**, 1309–1316 (2010).
- 16 54. Banko, M., Mucha Kruczynska, I., Weise, C., Heyd, F. & Ewers, H. A homozygous  
17 genome-edited Sept2-EGFP fibroblast cell line. *Cytoskeleton (Hoboken)* **76**, 73–82  
18 (2019).
- 19
